# Supplementary material for: Post-Dilatation of New-Generation Self-Expandable Transcatheter Aortic Valves Does Not Increase Atrioventricular Conduction Abnormalities
Source: Diagnostics (Basel). 2023 Jan 24;13(3):427. doi: 10.3390/diagnostics13030427 (PMC9914379; doi:10.3390/diagnostics13030427)
Supplement: Supplementary file 1 [file diagnostics-13-00427-s001.zip › diagnostics-2131703-supplementary.pdf]

**Supplementary Table S1.** Procedural data and post-implantation outcomes in patients undergoing SE-TAVR.

|                                                | Total<br>(n=532) | No post-<br>dilatation group<br>(n= 428) | Post-dilatation group<br>(n=104) | p-value          |
|------------------------------------------------|------------------|------------------------------------------|----------------------------------|------------------|
| Valve types                                    |                  |                                          |                                  | <b>0.024</b>     |
| Corevalve™Evolut Pro*                          | 115 (21.6%)      | 101 (23.6%)                              | 14 (13.5%)                       |                  |
| Corevalve™Evolut R                             | 417 (78.4%)      | 327 (76.4%)                              | 90 (86.5%)                       |                  |
| Pre-dilatation                                 | 39 (7.3%)        | 30 (7.0%)                                | 9 (8.6%)                         | 0.668            |
| General anesthesia                             | 176 (33.1%)      | 151 (35.3%)                              | 25 (24.0%)                       | 0.029            |
| Access sites                                   |                  |                                          |                                  | <b>0.021</b>     |
| Transfemoral route                             | 353 (66.3%)      | 274 (64.0%)                              | 79 (76.0%)                       |                  |
| Subclavian route                               | 179 (33.6%)      | 154 (36.0%)                              | 25 (24.0%)                       |                  |
| Prosthesis Diameter (mm)                       |                  |                                          |                                  | 0.555            |
| 23                                             | 32 (6.0%)        | 28 (6.6%)                                | 4 (4.0%)                         |                  |
| 26                                             | 183 (34.4%)      | 143 (33.4%)                              | 40 (38.5%)                       |                  |
| 29                                             | 254 (47.7%)      | 203 (47.4%)                              | 51 (49.0%)                       |                  |
| 31                                             | 11 (2.1%)        | 10 (2.3%)                                | 1 (1.0%)                         |                  |
| 34                                             | 52 (9.8%)        | 44 (10.3%)                               | 8 (7.7%)                         |                  |
| Fluoroscopy time, mean (min)                   | 11.8±4.8         | 11.4±4.7                                 | 13.9±4.9                         | <b>&lt;0.001</b> |
| Contrast medium load, median (ml)              | 142±38           | 139±35                                   | 157±45                           | <b>&lt;0.001</b> |
| Post-procedure LVEF (%)                        | 57.3±9.9         | 57.2±9.9                                 | 58.0±9.9                         | 0.507            |
| Post TAVR, Aortic valve area (cm²)             | 1.9±0.6          | 1.8±0.6                                  | 2.08±0.6                         | 0.078            |
| Regurgitation localizations                    |                  |                                          |                                  | <b>&lt;0.001</b> |
| Central                                        | 25 (4.7%)        | 17 (4.0%)                                | 8 (7.7%)                         |                  |
| Central and peri-prosthetic                    | 7 (1.3%)         | 5 (1.2%)                                 | 2 (1.9%)                         |                  |
| peri-prosthetic *                              | 274 (51.5%)      | 204 (47.6%)                              | 70 (67.3%)                       |                  |
| Post-procedure aortic regurgitation > moderate | 68 (12.8%)       | 38 (8.9%)                                | 34 (32.7%)                       | <b>&lt;0.001</b> |
| Post-procedure TAVR mean gradient (mmHg)       | 7.5±4.3          | 7.4±4.2                                  | 7.8±4.9                          | 0.535            |
| Length of hospital stay (Days)                 | 8.3±4.7          | 8.3±4.7                                  | 8.4±4.7                          | 0.823            |

LVEF: left ventricular ejection fraction; TAVR: transcatheter aortic valve replacement.

**Supplementary Table S2.** Procedural clinical endpoints.

|                                            |               | <b>Total</b>   | <b>No post-dilatation group</b> | <b>Post-dilatation group</b> | <b>p-value</b> |
|--------------------------------------------|---------------|----------------|---------------------------------|------------------------------|----------------|
|                                            |               | <b>(n=532)</b> | <b>(n= 428)</b>                 | <b>(n=104)</b>               |                |
| Acute kidney injury (during hospital stay) |               | 2 (0.4%)       | 1 (0.2%)                        | 1 (1.0%)                     | 0.277          |
| Pulmonary embolism                         |               | 1 (0.2%)       | 1 (0.2%)                        | 0 (0%)                       | 0.805          |
| Sepsis                                     |               | 4 (0.7%)       | 3 (0.7%)                        | 1 (1.0%)                     | 0.783          |
| Life-threatening bleeding                  |               | 3 (0.6%)       | 2 (0.5%)                        | 1 (1.0%)                     | 0.539          |
| Minor bleeding                             |               | 8 (1.5%)       | 6 (1.4%)                        | 2 (2.9%)                     | 0.285          |
| Vascular access complications              |               | 21 (3.9%)      | 18 (4.2%)                       | 3 (2.9%)                     | 0.535          |
| Stroke                                     |               |                |                                 |                              |                |
|                                            | Per-procedure | 2 (0.4%)       | 2 (0.5%)                        | 0 (0%)                       | 0.647          |
|                                            | In-hospital   | 9 (1.7%)       | 7 (1.6%)                        | 2 (1.9%)                     | 0.838          |
| Conversion to cardiac surgery              |               | 1 (0.2%)       | 1 (0.2%)                        | 0 (0%)                       | 0.622          |
| Cardiac tamponade                          |               | 1 (0.2%)       | 1 (0.2%)                        | 0% (0)                       | 0.622          |
| Coronary obstruction during TAVR           |               | 0 (0%)         | 0 (0%)                          | 0 (0%)                       | /              |
| Aortic rupture                             |               | 2 (0.4%)       | 2 (0.5%)                        | 0 (0%)                       | 0.827          |
| Valvular migration during procedure        |               | 2 (0.4%)       | 1 (0.2%)                        | 1 (1.0%)                     | 0.277          |
| Mortality                                  |               |                |                                 |                              |                |
|                                            | Per-procedure | 2 (0.4%)       | 1 (0.2%)                        | 1 (1.0%)                     | 0.272          |
|                                            | In-hospital   | 9 (1.7%)       | 7 (1.6%)                        | 2 (2.0%)                     | 0.827          |
|                                            | 30-day        | 13 (2.4%)      | 9 (2.1%)                        | 4 (3.8%)                     | 0.302          |
|                                            | 1-year        | 49 (10.3%)     | 41 (10.7%)                      | 8 (8.4%)                     | 0.507          |

TAVR: transcatheter aortic valve replacement.

**Supplementary Table S3.** Post-implantation aortic regurgitation severity after SE-TAVR implantation.

|                                 |              | <b>Total<br/>(n=104)</b> | <b>Corevalve<br/>Evolut R<br/>(n= 90)</b> | <b>Corevalve<br/>Evolut Pro<br/>(n=14)</b> | <b>p-value</b> |
|---------------------------------|--------------|--------------------------|-------------------------------------------|--------------------------------------------|----------------|
| Post-implantation regurgitation |              |                          |                                           |                                            | 0.532          |
|                                 | None or mild | 27 (26.0%)               | 24 (26.7%)                                | 3 (21.4%)                                  |                |
|                                 | Moderate     | 54 (51.9%)               | 44 (48.9%)                                | 10 (71.4%)                                 |                |
|                                 | Severe       | 23 (22.1%)               | 22 (24.4%)                                | 1 (7.1%)                                   |                |
| Post-dilatation regurgitation   |              |                          |                                           |                                            | 0.378          |
|                                 | None or mild | 65 (62.5%)               | 54 (60.0%)                                | 11 (78.6%)                                 |                |
|                                 | Moderate     | 36 (34.6%)               | 33 (36.7%)                                | 3 (21.4%)                                  |                |
|                                 | Severe       | 3 (2.9%)                 | 3 (3.3%)                                  | 0 (0%)                                     |                |

TAVR: transcatheter aortic valve replacement.
